# Supplementary material
Source: PubMed Central journal article supplement (PMC503732)

A

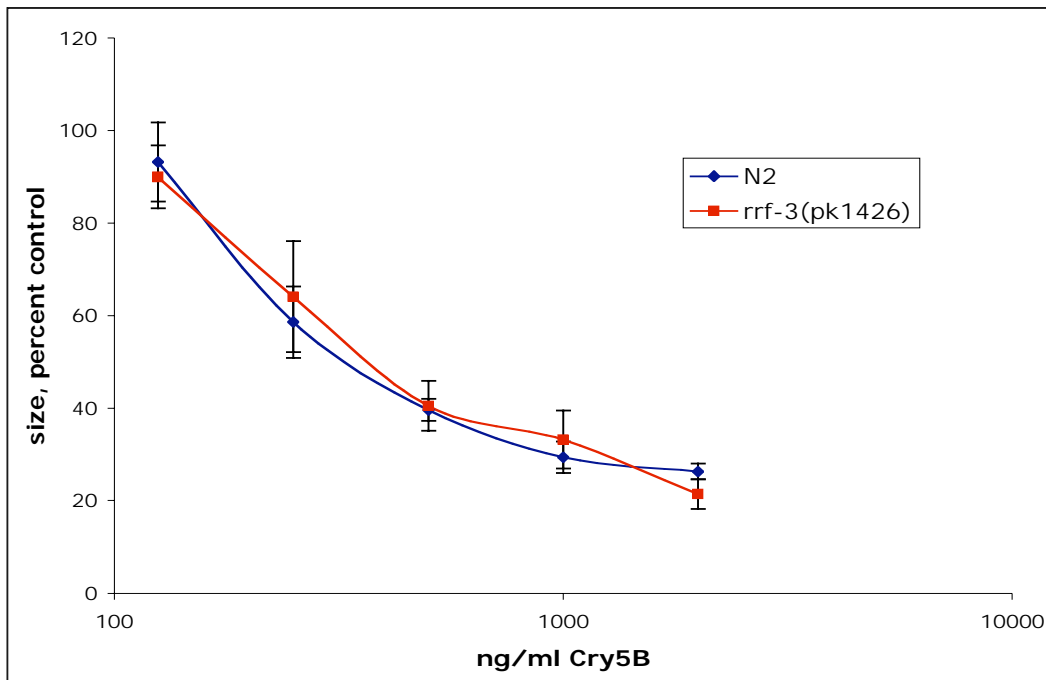

B

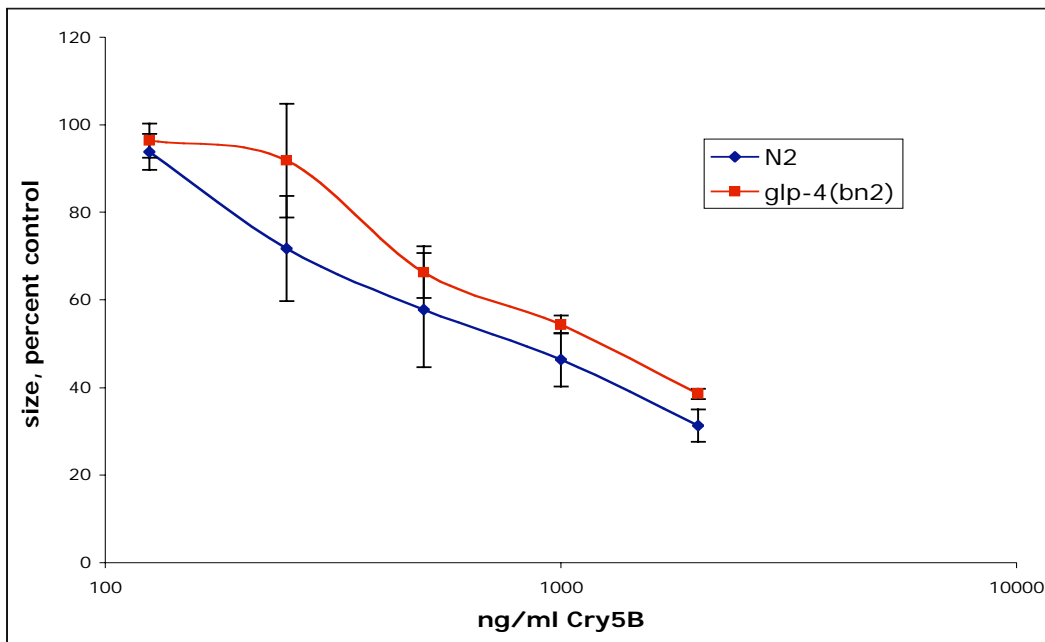

Supplement: pnas_101_30_10995__2.pdf [file pnas_101_30_10995__2.pdf]
